# Supplementary material for: Analytical ultracentrifugation in saliva research: Impact of green tea astringency and its significance on the in-vivo aroma release
Source: PubMed Central journal article supplement (PMC6127339; doi:10.1038/s41598-018-31625-w), 2018-09-06
Supplement: 41598_2018_31625_MOESM1_ESM.pdf [file 41598_2018_31625_MOESM1_ESM.pdf]

## SUPPLEMENTARY

### **Analytical ultracentrifugation in saliva research: Impact of green tea astringency and its significance on the *in-vivo* aroma release.**

Vlad Dinu<sup>1,3</sup>, Chujiao Liu<sup>3</sup>, Joseph Ali<sup>4</sup>, Charfedinne Ayed<sup>3</sup>, Pavel Gershkovich<sup>4</sup>, Gary G. Adams<sup>1,2</sup>, Stephen E. Harding<sup>1</sup> and Ian Fisk<sup>3\*</sup>.

<sup>1</sup>*National Centre of Macromolecular Hydrodynamics, Division of Food Sciences, School of Biosciences, University of Nottingham, Sutton Bonington Campus, Leicestershire, UK*

<sup>2</sup>*School of Health Sciences, Faculty of Medicine and Health Sciences, Queen's Medical Centre, Clifton Boulevard, Nottingham, UK*

<sup>3</sup>*Division of Food Sciences, School of Biosciences, University of Nottingham, Sutton Bonington Campus, Leicestershire, UK*

<sup>4</sup>*School of Pharmacy, University of Nottingham, Nottingham, United Kingdom, UK*

Corresponding author: [ian.fisk@nottingham.ac.uk](mailto:ian.fisk@nottingham.ac.uk)

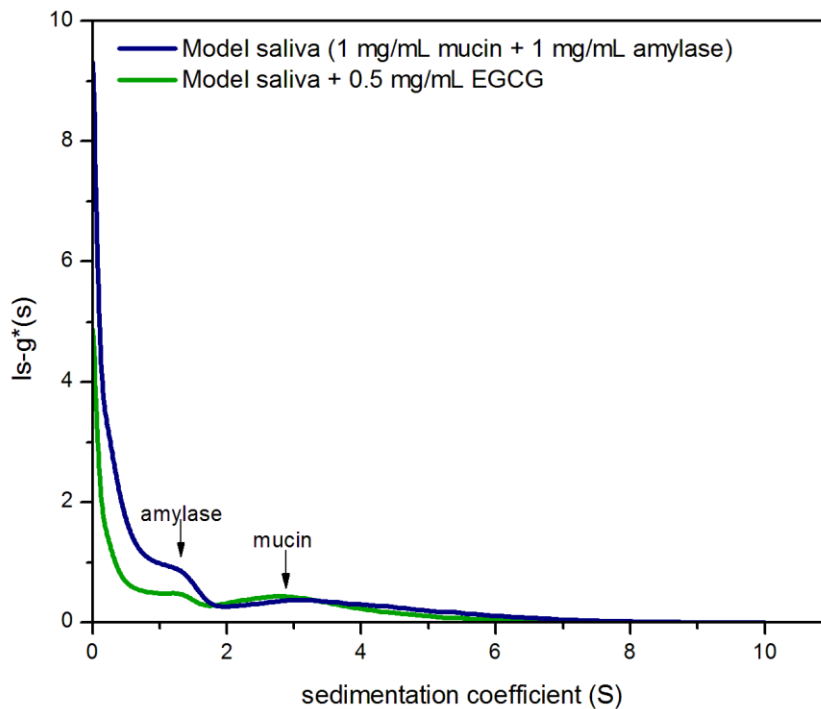

**Supplementary figure 1. Sedimentation velocity,  $ls-g^*(s)$  distributions for model saliva (blue) and what happens upon the addition of 0.5 mg/mL EGCG.** The model saliva is made with 1 mg/mL bovine submaxillary mucin and 1 mg/mL porcine pancreatic  $\alpha$ -amylase in 0.1 M PBS, pH 6.8. The distributions are broad and show two components:  $\alpha$ -amylase ranging from 0 to 2S and mucin ranging from 2 to 8S. The addition of 0.5 mg/mL EGCG results in a decrease in the  $\alpha$ -amylase peak, equivalent to 47%, as indicated by the area under the curve for the first peak (Area =  $(X_1+X_2)/2 \cdot (S_2-S_1)$ , where X represents data points for the sedimentation coefficient distribution curve and S represents the data points range within the sedimentation coefficient distribution).

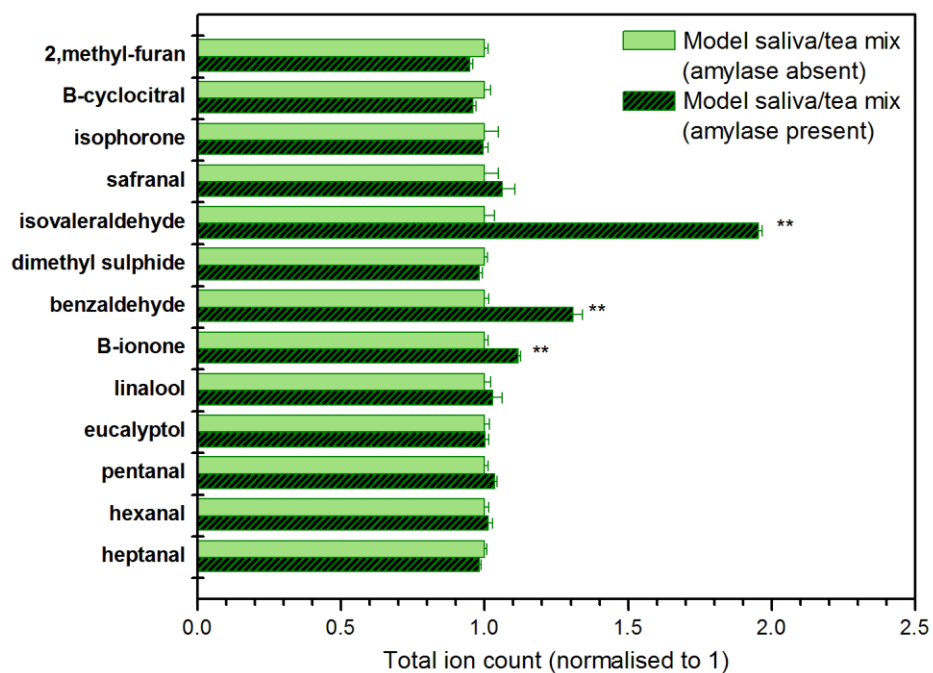

**Supplementary figure 2. Effect of green tea on the release of aroma compounds from model saliva in the presence (dashed green) and absence (green) of  $\alpha$ -amylase.** The experiment was made using bovine submaxillary mucin at 1 mg/mL and 1 mg/mL porcine pancreatic  $\alpha$ -amylase. Each model saliva sample was mixed with green tea brew at a 1:1 ratio. The comparison is made by Tukey's post hoc test to calculate the P-values ( $P < 0.01^{**}$ ). The data shown as mean  $\pm$  SD, n=3.
